# Supplementary material for: Regulation of androgen receptor signaling by ubiquitination during folliculogenesis and its possible dysregulation in polycystic ovarian syndrome
Source: PubMed Central journal article supplement (PMC5578986; doi:10.1038/s41598-017-09880-0), 2017-08-31

**Supplementary information**

**Regulation of androgen receptor signaling by ubiquitination during folliculogenesis and its possible dysregulation in polycystic ovarian syndrome**

Jung Jin Lim<sup>1,5</sup>, Patricia D.A. Lima<sup>1</sup>, Reza Salehi<sup>1</sup>, Dong Ryul Lee<sup>3,4</sup>, Benjamin K. Tsang<sup>1,2</sup>

<sup>1</sup>Department of Obstetrics and Gynecology and Cellular and Molecular Medicine, University of Ottawa, and Chronic Disease Program, Ottawa Hospital Research Institute, Ottawa, Ontario, Canada K1H 8L6

<sup>2</sup>State Key Laboratory of Quality Research in Chinese Medicine, Macau Institute for Applied Research in Medicine and Health, Macau University of Science and Technology, Avenida Wai Long, Taipa, Macao, China;

<sup>3</sup>Fertility Center of CHA Gangnam Medical Center, College of Medicine, CHA University, Seoul, Korea, 135-913

<sup>4</sup>Department of Biomedical Science, College of Life Science, CHA University, Seoul, Korea, 135-081

<sup>5</sup>Department of Biomedical Science, Graduate School of Biomedical Science and Engineering, Hanyang University, Seoul, Korea, 133-791

**Supplementary Table 1 List of Antibodies used in current studies.**

| Primary antibodies       |            |                         |                   |           |                 |                |
|--------------------------|------------|-------------------------|-------------------|-----------|-----------------|----------------|
| Name                     | Isotype    | Specie cross-reactivity | Supplier          | Cat. No.  | Dilution in W.B | Dilution in IF |
| Anti-human RNF6          | Rabbit IgG | R, M, H                 | Abcam             | ab-80427  | 1:1000          | 1:200          |
| Anti-human AR            | Rabbit IgG | R, M                    | Origene           | TA307638  | 1:1000          | 1:200          |
| Anti-human Ubiquitin K48 | Rabbit IgG | R, M, H                 | Abcam             | ab-190061 | 1:1000          | NA             |
| Anti-mouse Ubiquitin K63 | Mouse IgG  | R, M, H                 | Biologend         | #-932202  | 1:1000          | NA             |
| Anti-human GAPDH         | Rabbit IgG | R, M, H                 | Santa cruz        | sc-25778  | 1:8000          | NA             |
| Anti-human Kit ligand    | Mouse IgG  | R, M, H                 | Santa cruz        | sc-13126  | NA              | 1:200          |
| Anti-human GDF9          | Goat IgG   | R, M, H                 | Santa cruz        | Sc-12244  | NA              | 1:200          |
| Secondary antibodies     |            |                         |                   |           |                 |                |
| Name                     | Isotype    | Dye                     | Supplier          | Cat. No.  | W.B             | IF             |
| Mouse IgG (H+L)          | Goat IgG   | Alexa 488               | Thermo Fisher     | A-11001   | NA              | 1:200          |
| Mouse IgG (H+L)          | Goat IgG   | Alexa 594               | Thermo Fisher     | A-11005   | NA              | 1:200          |
| Rabbit IgG (H+L)         | Goat IgG   | Alexa 680               | Life Technologies | A-21077   | 1:10000         | NA             |
| Mouse IgG (H+L)          | Goat IgG   | DyLight 800             | Thermo Fisher     | SA5-10176 | 1:10000         | NA             |

**Supplementary Table 2 List of Primers used in the current studies**

| Gene   | Gene bank Accession No. | Primer Sequence (5'-3')                            | Amplicon size (bp) | Annealing Temp. (°C) |
|--------|-------------------------|----------------------------------------------------|--------------------|----------------------|
| sKIT-L | NM_021843.4             | F: TGACCTCGTGGCATGTATGG<br>R: GCTGCAACAGGGGGTAACAT | 206                | 52                   |
| GAPDH  | XM_017592435.1          | F: TGTGAACGGATTTGGCCGTA<br>R: GATGGTGATGGGTTTCCCGT | 208                | 56                   |

Supplementary figure 1 Blot in the Figure 2C and 2D (Do not contract change)

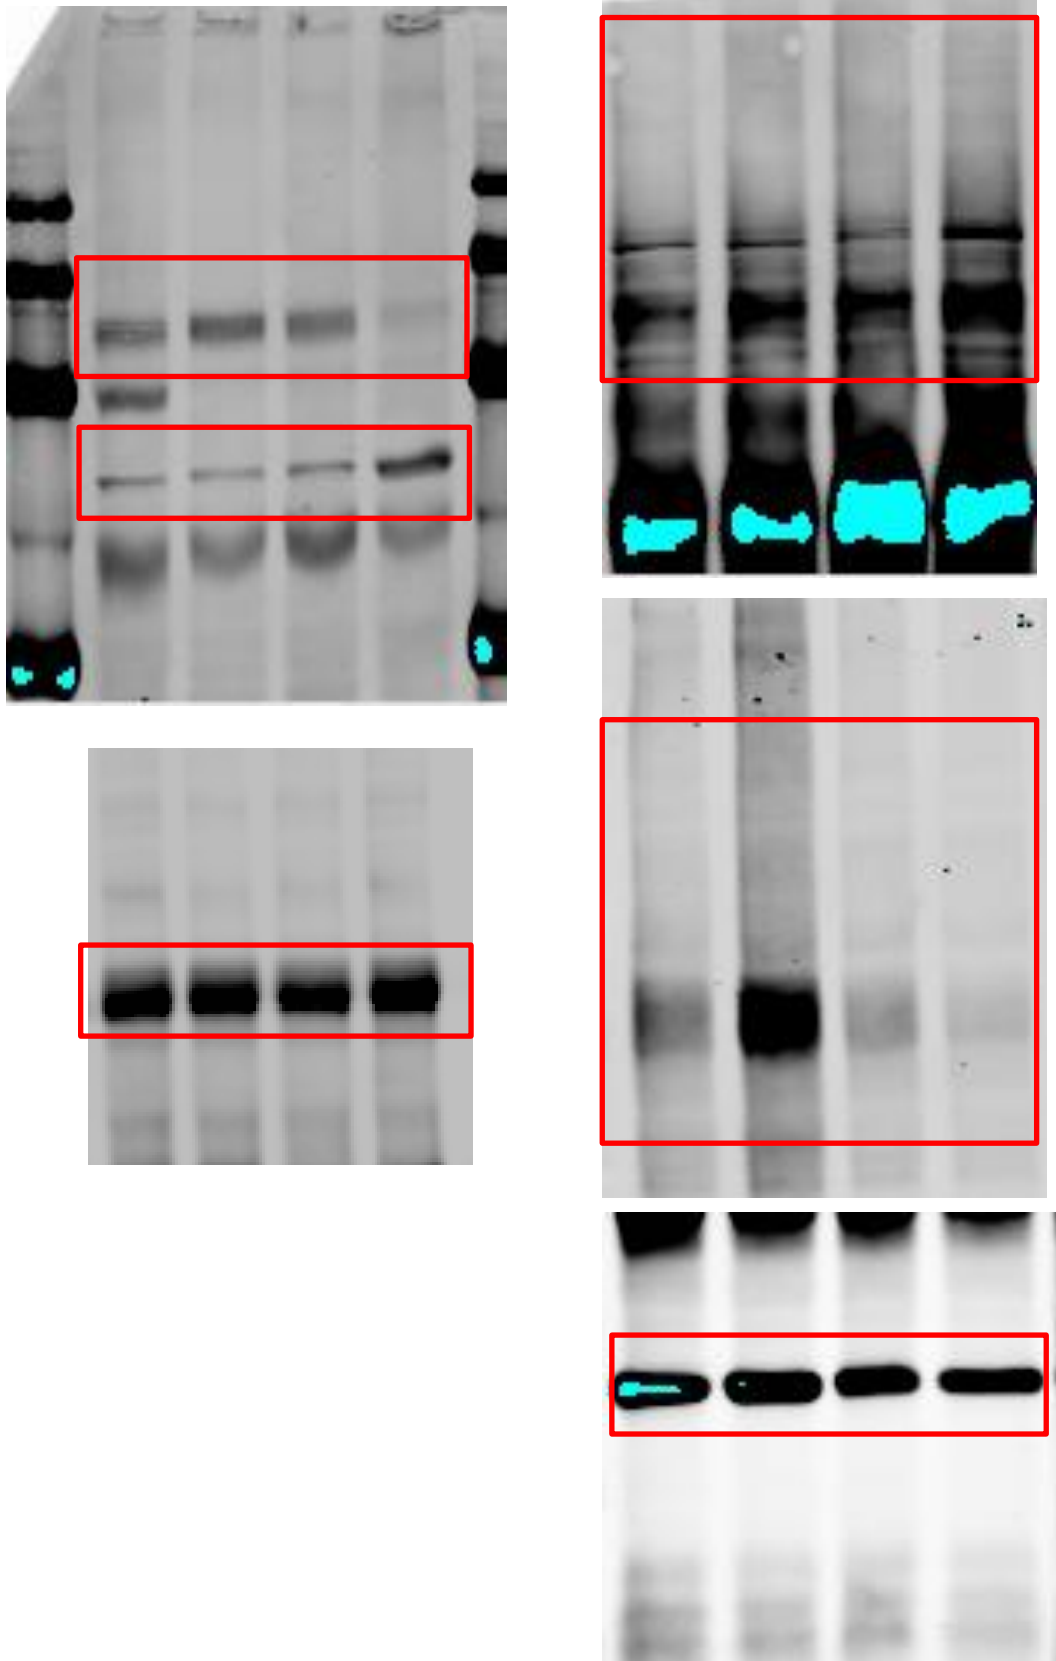

Supplementary figure 1 Blot in the Figure 3A and 3B (Do not contract change)

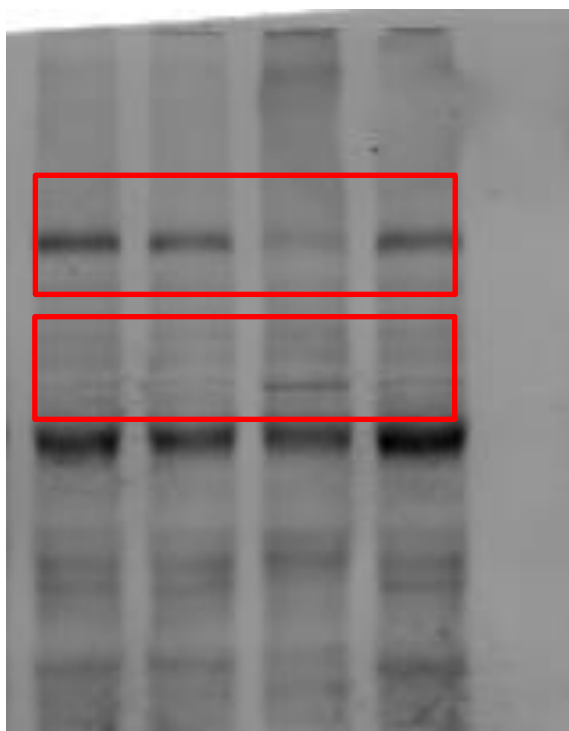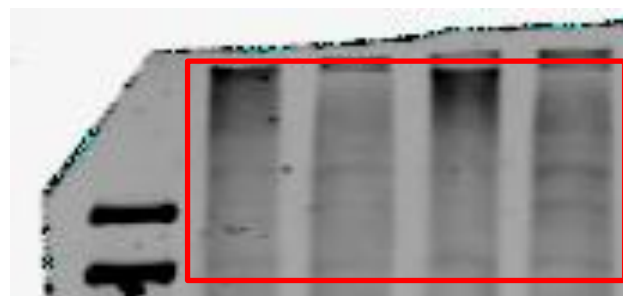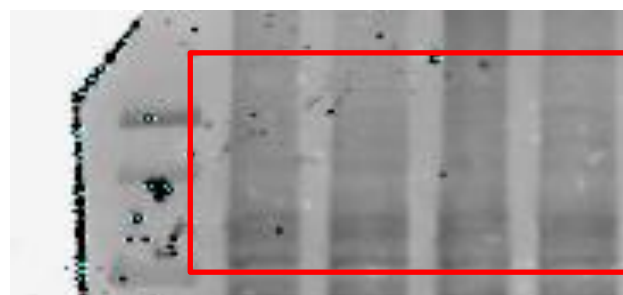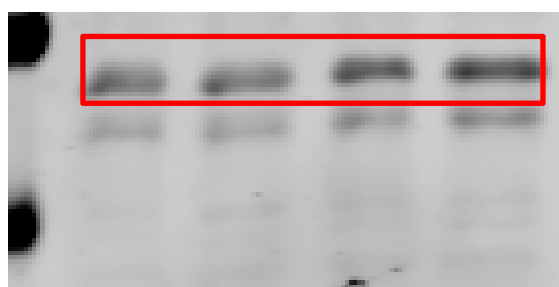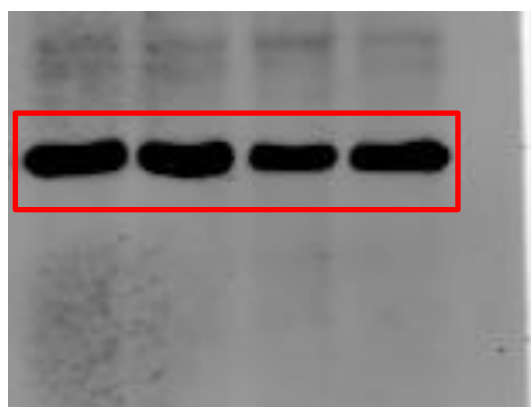

Supplement: 41598_2017_9880_MOESM1_ESM.pdf [file 41598_2017_9880_MOESM1_ESM.pdf]
